# Supplementary material
Source: publisher figshare collection journal article supplement (https://tandf.figshare.com/ndownloader/files/21695931)
Supplement: Supplementary file 1 [file 21695931]

# Supplementary Information

## **Exploring the potency of currently used drugs against HIV-1 protease of subtype D variant by using multiscale simulations**

Md Fulbabu Sk, Rajarshi Roy, Parimal Kar\*

Discipline of Biosciences and Biomedical Engineering, Indian Institute of Technology Indore, Simrol Campus, Khandwa Road, Simrol, Indore-453552, Madhya Pradesh, India.

\*Corresponding Author: Parimal Kar | Email: [parimal@iiti.ac.in](mailto:parimal@iiti.ac.in) | Phone: +91 731 2438700  
(Ext. 550)

**Table S1:** Mean and standard deviation (SD) values for different C $\alpha$  angles calculated (in the flap tip region of HIV-PR) for all four complexes and apo structures. All values are in degree [°] unit.

|                    | <b>Apo</b> |      | <b>ATV/PR</b> |       | <b>DRV/PR</b> |      | <b>LPV/PR</b> |      | <b>TPV/PR</b> |      |
|--------------------|------------|------|---------------|-------|---------------|------|---------------|------|---------------|------|
| <b>Angles</b>      | Mean       | SD   | Mean          | SD    | Mean          | SD   | Mean          | SD   | Mean          | SD   |
| <b>49-50-51</b>    | 109.37     | 4.44 | 111.06        | 4.29  | 111.27        | 4.06 | 110.55        | 6.11 | 110.73        | 3.95 |
| <b>50-51-52</b>    | 96.15      | 5.06 | 96.94         | 4.55  | 93.29         | 3.96 | 90.41         | 4.59 | 93.72         | 4.05 |
| <b>51-52-53</b>    | 143.70     | 8.80 | 146.06        | 7.70  | 141.01        | 8.77 | 144.73        | 6.90 | 134.58        | 8.71 |
| <b>49'-50'-51'</b> | 92.89      | 3.82 | 93.86         | 5.90  | 93.72         | 4.03 | 95.41         | 4.30 | 94.84         | 3.89 |
| <b>50'-51'-52'</b> | 98.10      | 5.07 | 107.51        | 13.30 | 99.40         | 5.69 | 100.06        | 6.98 | 99.57         | 4.43 |
| <b>51'-52'-53'</b> | 144.70     | 6.80 | 138.54        | 8.63  | 143.27        | 7.00 | 142.76        | 7.51 | 139.15        | 7.76 |

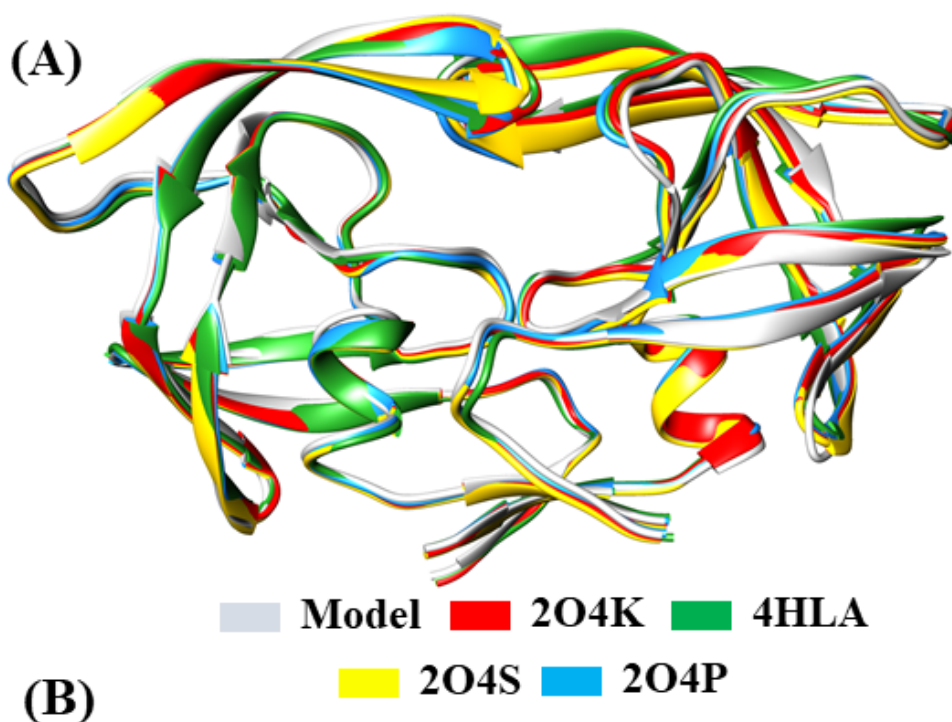

| Templates Structures<br>(Subtype B) | $\Delta$ RMSD<br>(Å) |
|-------------------------------------|----------------------|
| 2O4K                                | 0.58                 |
| 4HLA                                | 0.53                 |
| 2O4S                                | 0.42                 |
| 2O4P                                | 0.36                 |

**Figure S1:** (A) The structural alignment of the model structure (subtype D) along with the respective complex crystal structure of subtype B. (B) The overall RMSD difference of the model structure and respective complex crystal structures.

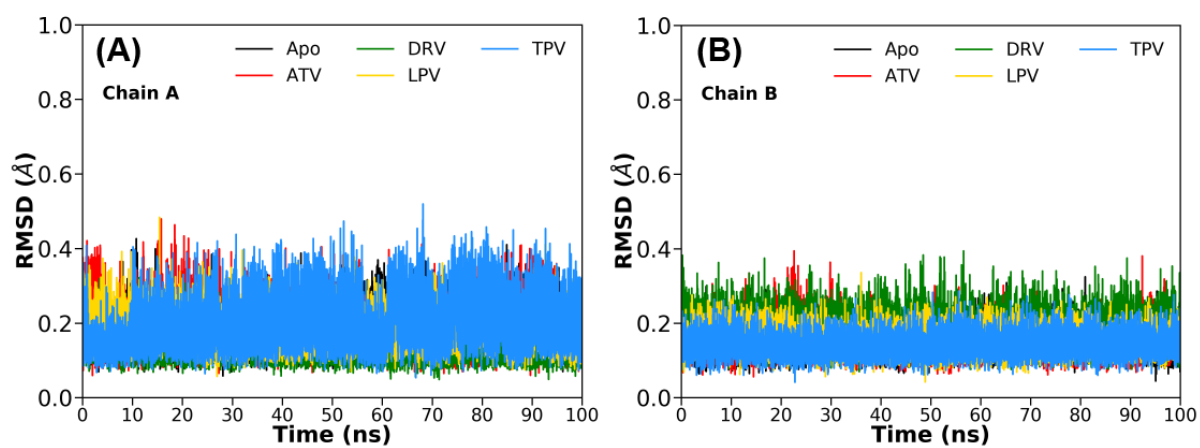

**Figure S2:** Time evolution of RMSD for active site residues 25-27 (chain A) and residues 25'-27' (chain B) for four inhibitors with HIV-1 subtype D and Apo system.

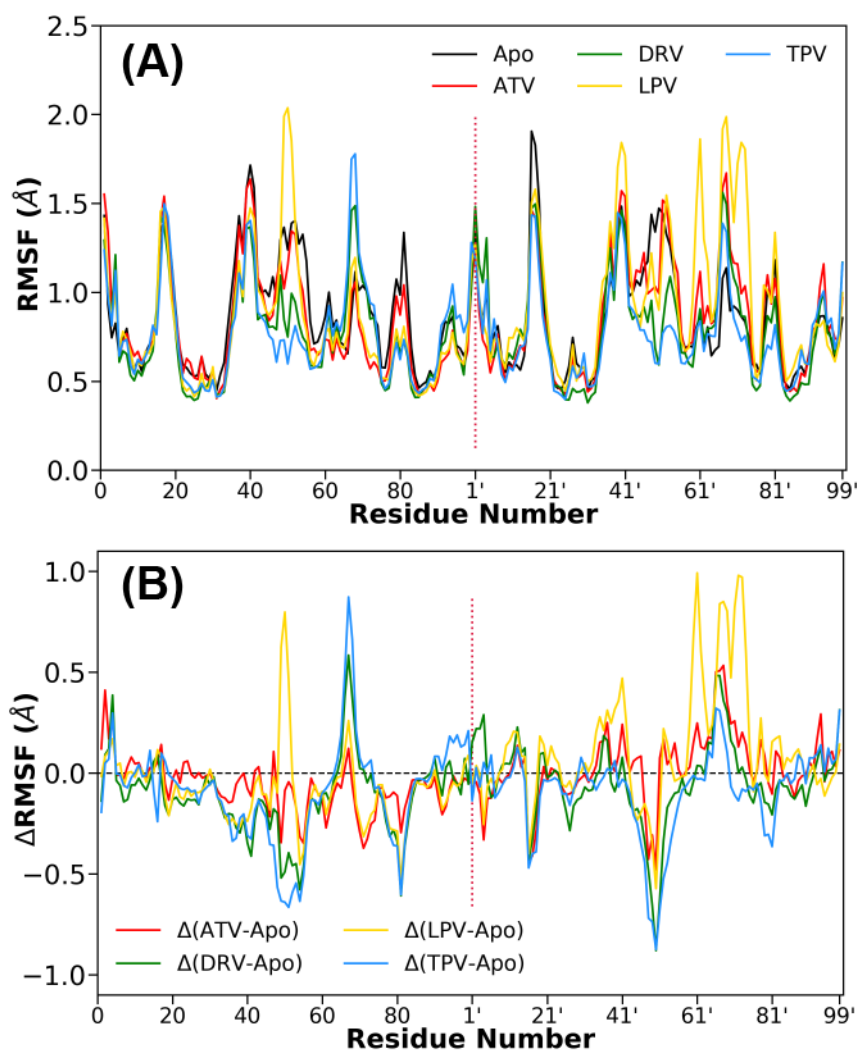

**Figure S3:** (A) Root-mean-square fluctuations (**RMSF**) of PR<sup>D</sup> complexed with ATV, DRV, LPV and TPV and Apo systems. Residues 1-99, chain A and 1'-99', chain B. (B) The differences of RMSF values of every residue in PR<sup>D</sup> of each complexes with respect to Apo system.

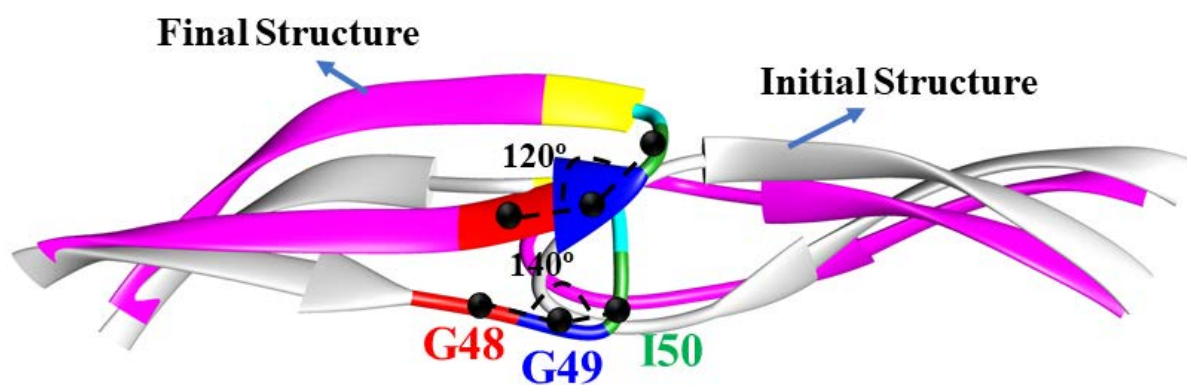

**Figure S4:** A representative structure of LPV/PR<sup>D</sup> corresponding to TriC $\alpha$  angle (G48-G49-I50) of 140° deg and 120°.

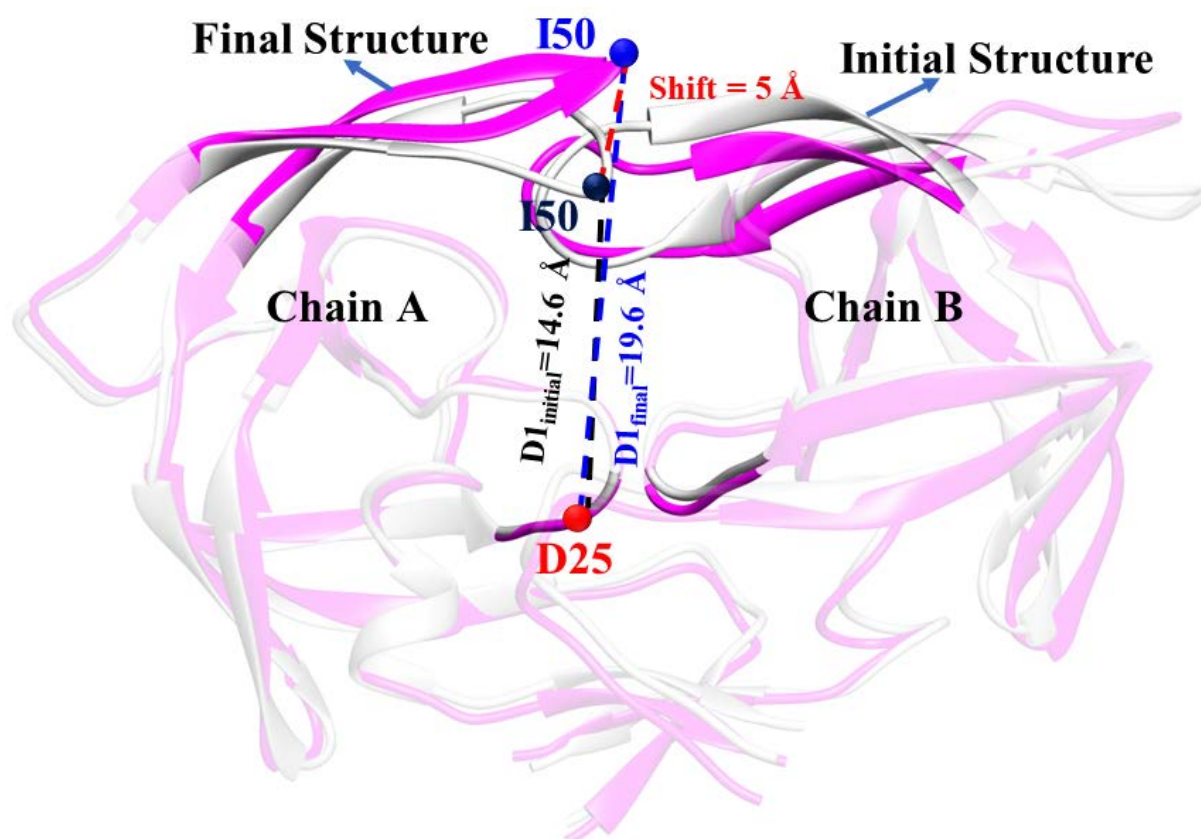

**Figure S5:** Representative structures of LPV/PR<sup>D</sup> corresponding to the D25@Ca-I50@Ca distance of 14.6 and 19.6 Å. The magenta and gray colors correspond to the final and initial structure.

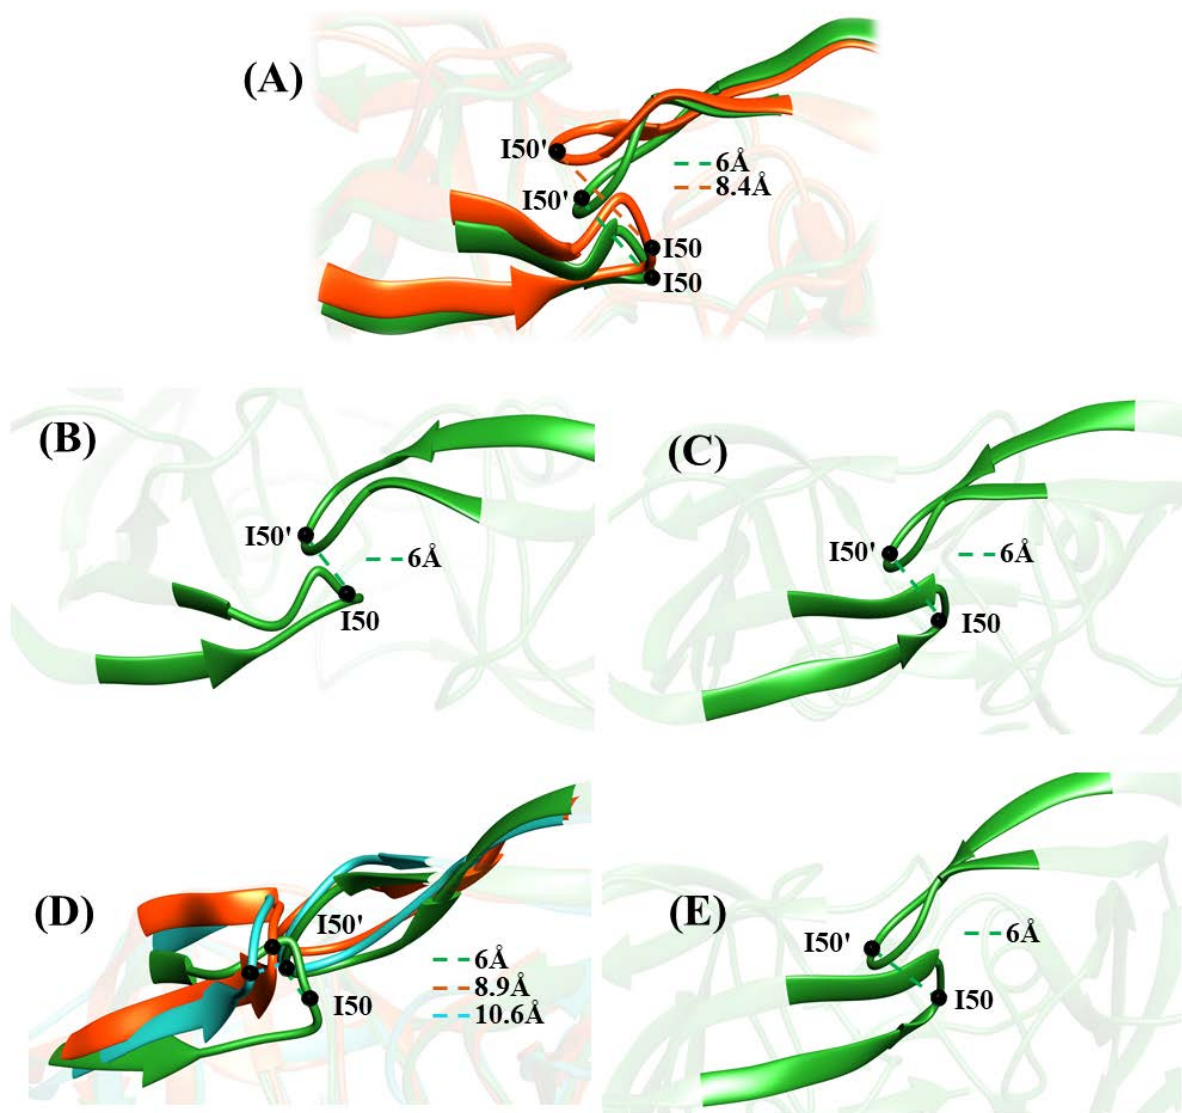

**Figure S6:** Structures corresponding to the most probable distance between I50@C<sub>α</sub>-I50'@C<sub>α</sub>. (A) Apo/PR<sup>D</sup>, (B) ATV/PR<sup>D</sup>, (C) DRV/PR<sup>D</sup>, (D) LPV/PR<sup>D</sup>, and (E) TPV/PR<sup>D</sup>.



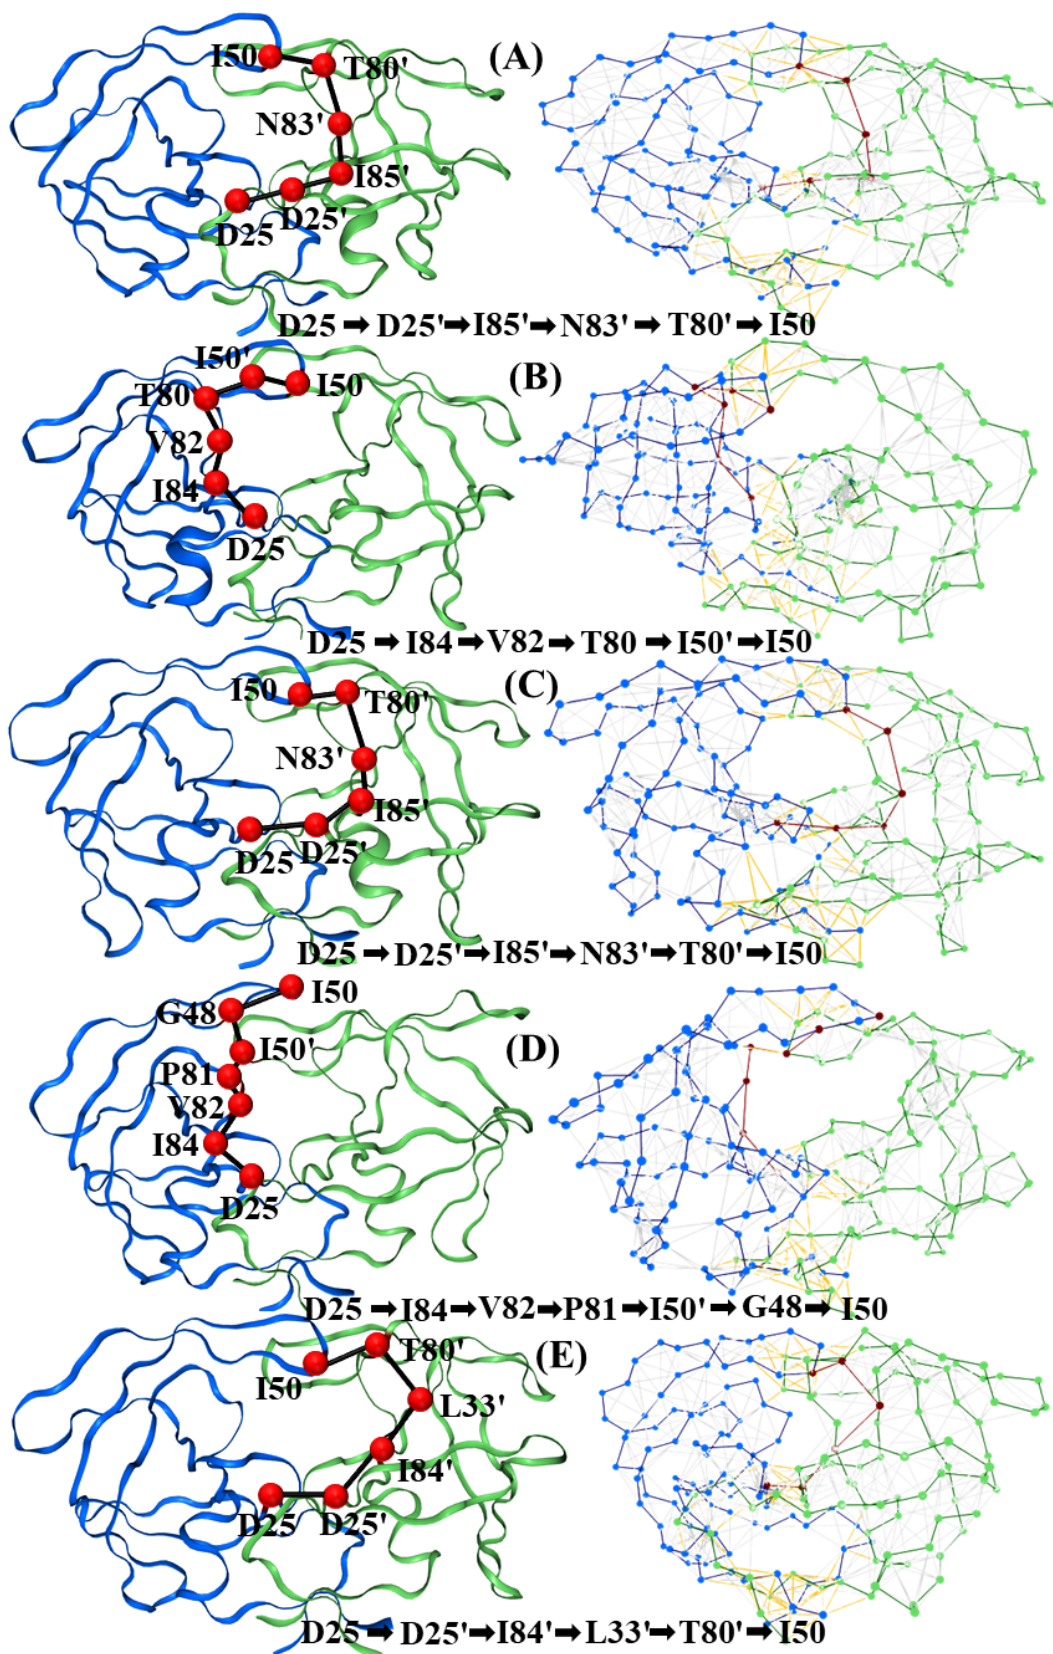

**Figure S7:** Shortest communication path between the chain A D25 and chain I50 residue or nodes along with network maps investigated via NAPS in (A) Apo, (B) ATV, (C) DRV, (D) LPV and (D) TPV systems.

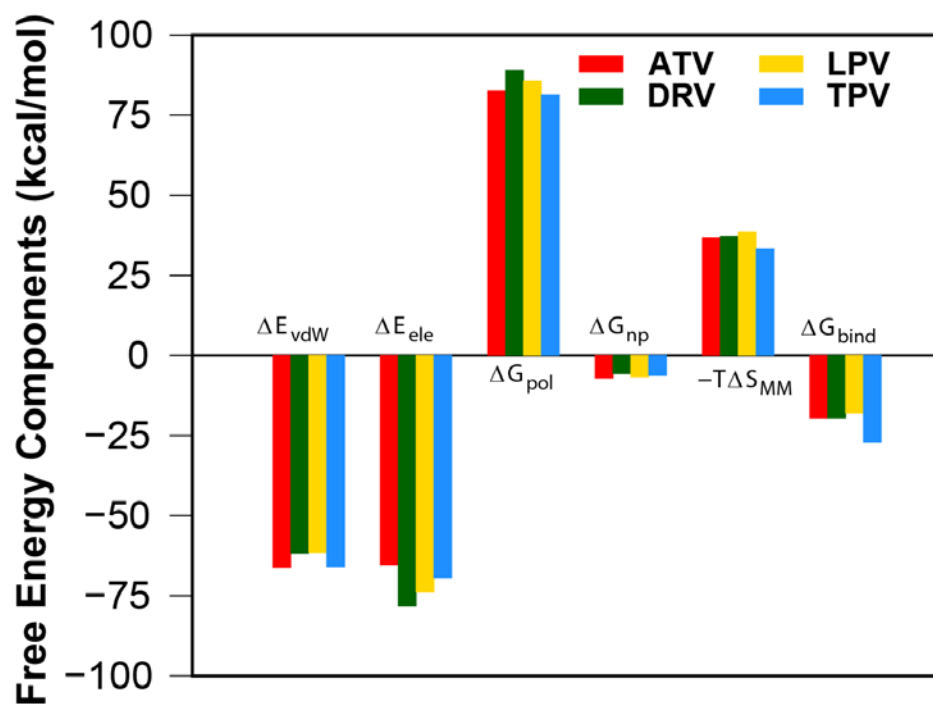

**Figure S8:** Energy components (kcal/mol) for the binding of drugs to the HIV-1 subtype D.  $\Delta E_{vdW}$ , van der Waals energy;  $\Delta E_{elect}$ , electrostatics energy in gas phase;  $\Delta G_{polar}$ , polar solvation energy;  $\Delta G_{nonpolar}$ , nonpolar solvation energy;  $T\Delta S_{MM}$ , configurational entropy contribution and  $\Delta G_{bind}$ , total binding energy.

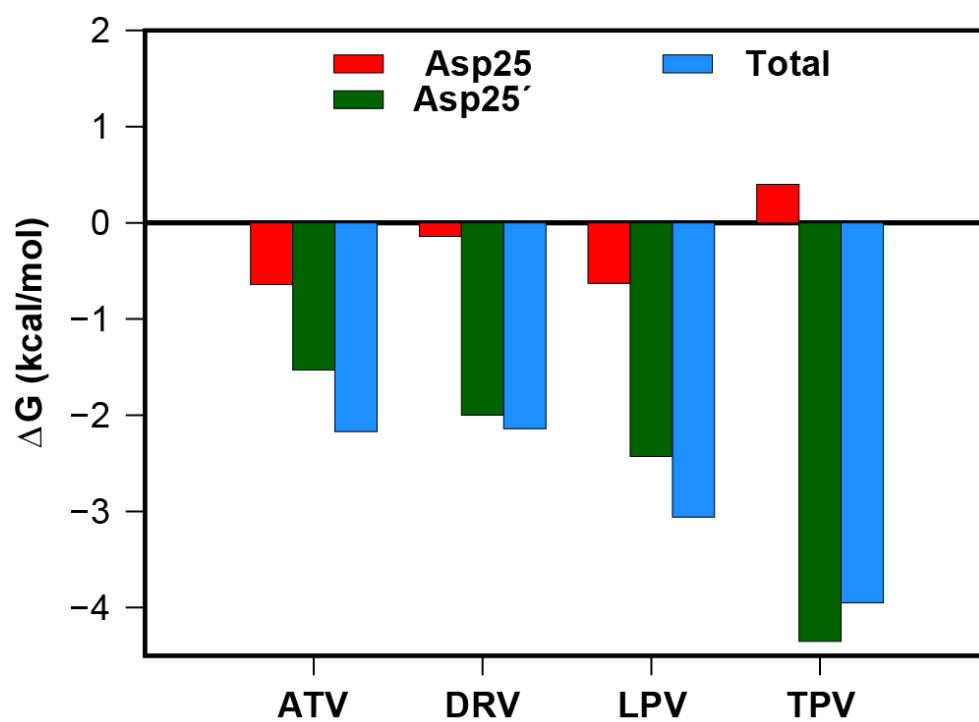

**Figure S9:** Contribution to the binding free energy from the Asp25/Asp25' dyad in kcal/mol.



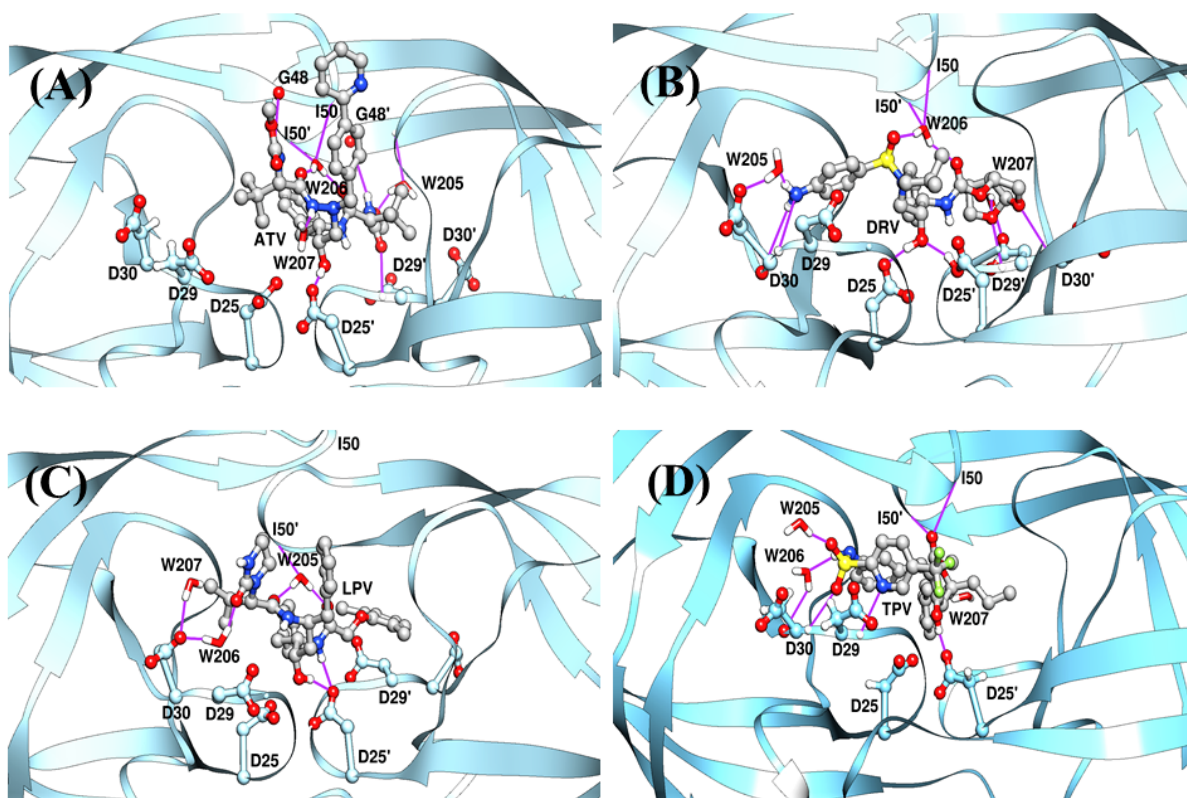

**Figure S11:** A view of the binding mode of (A) ATV, (B) DRV, (C) LPV and (D) TPV. The dark purple lines represent hydrogen bonds.

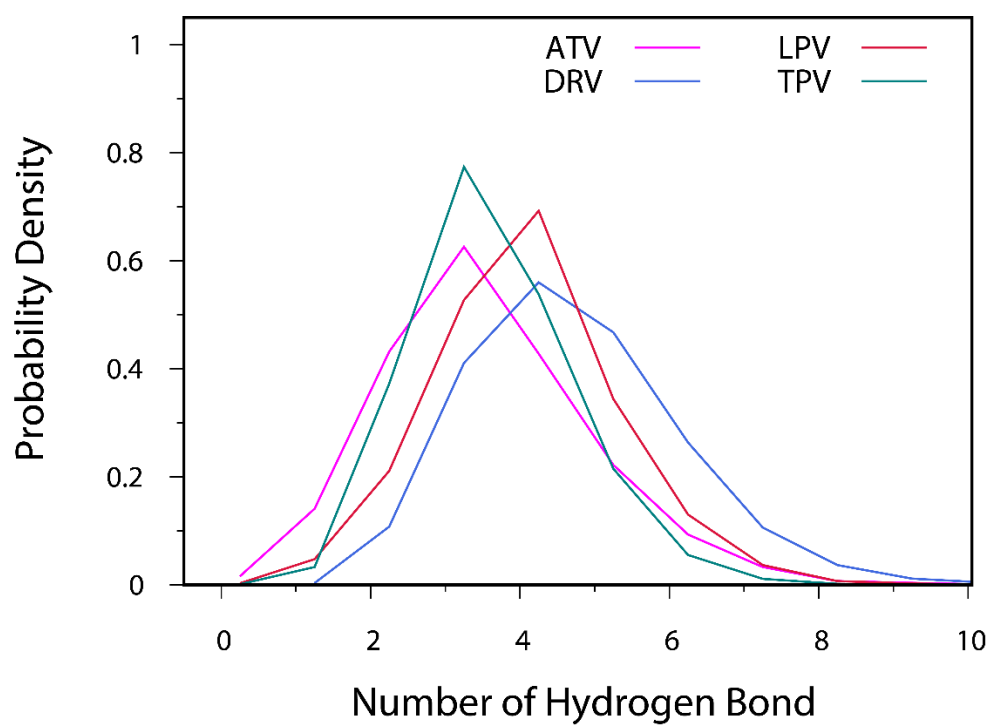

**Figure S12:** Histogram distribution of the number of hydrogen bond distributions for four inhibitors complexed with PR<sup>D</sup>.



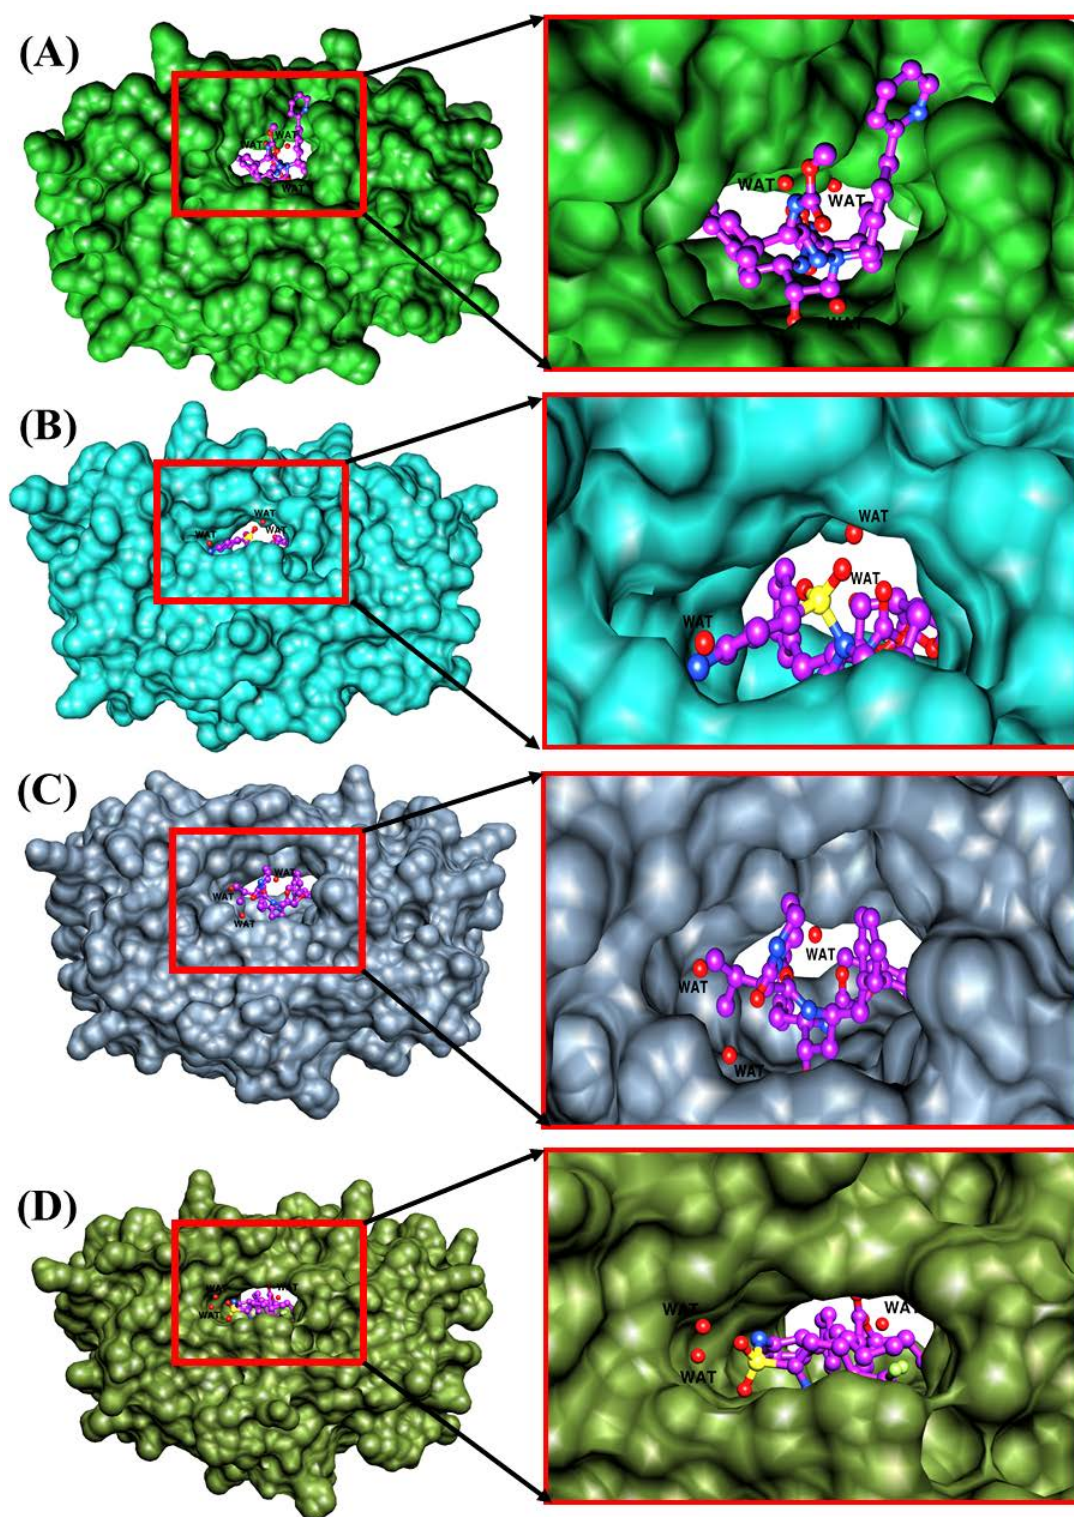

**Figure S13:** The surface representation of protein and binding pocket of drugs with three water molecules. (A) ATV/PR<sup>D</sup>, (B) DRV/PR<sup>D</sup>, (C) LPV/PR<sup>D</sup>, and (D) TPV/PR<sup>D</sup>.
